# Supplementary material for: Fast- or Slow-inactivated State Preference of Na+ Channel Inhibitors: A Simulation and Experimental Study
Source: PLoS Comput Biol. 2010 Jun 17;6(6):e1000818. doi: 10.1371/journal.pcbi.1000818 (PMC2887460; doi:10.1371/journal.pcbi.1000818)
Supplement: Table S1 — The effect of drug binding on rate constants (0.03 MB DOC) [file pcbi.1000818.s003.doc]

Tetracube model:

| **Unbound** | **Bound** |
| --- | --- |
| kaO | kaO/CA |
| kaC | kaC*CA |
| kfO | kfO/CF |
| kfC | kfC*CF |
| ksO | ksO/CS |
| ksC | ksC*CS |

MSA model:

| **Unbound** | **Bound** |
| --- | --- |
| ficn | ficn*CF |
| fio | fio*CF |
| frcn | frcn/CF |
| fro | fro/CF |
| sicn | sicn*CS |
| sio | sio*CS |
| sicn | sicn/CS |
| sro | sro/CS |
