# Supplementary material for: Fast- or Slow-inactivated State Preference of Na+ Channel Inhibitors: A Simulation and Experimental Study
Source: PLoS Comput Biol. 2010 Jun 17;6(6):e1000818. doi: 10.1371/journal.pcbi.1000818 (PMC2887460; doi:10.1371/journal.pcbi.1000818)
Supplement: Table S2 — Calculation of association and dissociation rate constants (0.03 MB DOC) [file pcbi.1000818.s004.doc]

Tetracube model:

|  | **Association** | **Dissociation** |
| --- | --- | --- |
| **OOO** | ka*cc/CA | kd*CA |
| **COO** | ka*cc | kd |
| **OCO** | ka*cc*CF/CA | kd*CA/CF |
| **OOC** | ka*cc*CS/CA | kd*CA/CS |
| **OCC** | ka*cc*CF*CS/CA | kd*CA/(CF*CS) |
| **COC** | ka*cc*CS | kd/CS |
| **CCO** | ka*cc*CF | kd/CF |
| **CCC** | ka*cc*CF*CS | kd/(CF*CS) |

MSA model:

|  | **Association** | **Dissociation** |
| --- | --- | --- |
| **Cn or O** | ka*cc | kd |
| **Fn or FO** | ka*cc *CF*cc | kd/CF |
| **Sn or SO** | ka*cc *CS | kd/CS |
| **FSn or FSO** | ka*cc *CF*CS | kd/(CF*CS) |
